# Supplementary material for: Mouse HSA+ immature cardiomyocytes persist in the adult heart and expand after ischemic injury
Source: PLoS Biol. 2019 Jun 27;17(6):e3000335. doi: 10.1371/journal.pbio.3000335 (PMC6619826; doi:10.1371/journal.pbio.3000335)
Supplement: S4 Data — Ct values of the single adult HSA+ CMs (columns) multiplex qRTPCR using the Biomark platform for the genes in rows 2–44 shown in Fig 6B. Average (± SDs) of HSA+ CMs counted in sections of MI or sham-operated mice and average (± SDs) of Ki67+ HSA+, and HSA− CMs shown in Fig 6C. Mean area μm2 and mean length (μm, ±SDs) of adult HSA− and HSA+ CMs shown in Fig 6D. Frequencies (± SDs) of HSA+ CMs counted in Image stream analysis of infarcted or sham-operated hearts in 3 independent experiments shown in Fig 6E. CM, cardiomyocyte; HSA, heat stable antigen; Ki67, Kiel clone 67; MI, myocardial infarction; qRT-PCR, quantitative real time polymerase chain reaction. (XLSX) [file pbio.3000335.s016.xlsx]

## Sheet: data_Fig6B
	AdACD24+s7	AdACD24+s10	AdACD24+s11	AdACD24+s1	AdACD24+s5	AdACD24+s6	AdACD24+s1	AdACD24+s3
Isl1	38	38	38	38	38	38	38	38
Nkx2.5	38	38	38	38	38	38	38	38
Mef2c	38	38	38	38	38	38	38	38
Gata4	38	38	38	38	38	38	38	38
Tbx5	38	38	38	38	38	38	38	38
Myl2	38	38	38	38	38	38	38	38
Myl7	17.4408	18.0853	13.8762	14.5885	16.9048	13.9776	19.6144	18.8422
Tnnt2	38	38	15.7022	17.2557	19.1544	19.9896	38	38
Myh7	38	38	38	38	38	38	38	38
Myh6	38	38	19.0733	19.6667	38	18.7045	38	38
Gja1	38	38	38	38	38	38	38	38
Gja5	38	38	38	38	38	38	38	38
Gjc1	38	38	38	38	38	38	38	38
Rgs4 (2)	38	38	38	38	38	38	38	38
Wt1	38	38	38	38	38	38	38	38
Tbx18	38	38	38	38	38	38	38	38
Tbx20	38	38	38	38	38	38	38	38
Tbx3	38	38	38	38	38	38	38	38
Tbx2	38	38	38	38	38	38	38	38
Vcan	38	38	38	38	38	38	38	38
Acta2	38	38	38	38	38	38	38	38
Myh11	38	38	38	38	38	38	38	38
Snai2	38	38	38	38	38	38	38	38
Twist1	38	38	38	38	38	38	38	38
Scx	38	38	38	38	38	38	38	38
Tcf21	38	38	38	38	38	38	38	38
Ddr2	38	38	38	38	38	38	38	38
S100a4	38	38	38	38	38	38	38	38
Vim	38	38	38	38	38	38	38	38
Postn	38	38	38	38	38	38	38	38
Dcn	38	38	38	38	38	38	38	38
Col1a1	38	38	38	38	38	38	38	38
Col3a1	38	38	38	38	38	38	38	38
Fap	38	38	38	38	38	38	38	38
Des	38	38	19.9605	18.9557	38	38	38	38
Kdr	38	38	38	38	38	38	38	38
Flt1	38	38	38	38	38	38	38	38
Nfatc1	38	38	38	38	38	38	38	38
Tek	38	38	38	38	38	38	38	38
Tnc	38	38	38	38	38	38	38	38
Fn1	38	38	38	38	38	38	38	38
Kit	38	38	38	38	38	38	38	38
Cav3	38	38	38	38	38	38	38	38

## Sheet: data_Fig6C
Plot HSA + CMs:
Sham	MI
1.26 ± 1.37	5.81 ± 3.65
1.69 ± 1.55	4.89 ± 3.74
2.19 ± 2.20	3.69 ± 3.54
Plot Ki67+ CMs in MI
HSA+	HSA-
1.18 ± 1.10	0.78 ± 0.30
5.26 ± 3.13	2.63 ± 1.50
2.20 ± 1.70	0.74 ± 0.60

## Sheet: data_Fig6D
Plot CMs area:
HSA+	HSA-
373.75 ± 86.99	943.3 ± 106.6
Plot CMs length:
HSA+	HSA-
32.33 ± 8.25	50.52 ± 4.92

## Sheet: data_Fig6E
Plot HSA + CMs
sham:	MI:
0.71 ± 0.06	1.08 ± 0.17
0.44 ± 0.04	1.5 ± 0.12
0.69 ± 0.06	2.11 ± 0.18
