# Supplementary material for: Mouse HSA+ immature cardiomyocytes persist in the adult heart and expand after ischemic injury
Source: PLoS Biol. 2019 Jun 27;17(6):e3000335. doi: 10.1371/journal.pbio.3000335 (PMC6619826; doi:10.1371/journal.pbio.3000335)
Supplement: S7 Data — Frequency of E 15.5 HSA+ CMs with contractile properties in culture shown in S6A Fig. Number of positive wells (response) for the growth of CMs in 6–20 wells per dilution (cell numbers per well-dose) and per population (in column A) shown in S6B Fig. CM, cardiomyocyte; E, embryonic day; HSA, heat stable antigen. (XLSX) [file pbio.3000335.s019.xlsx]

## Sheet: data_S6A Fig
E15.5 beating cells
73.3
75
75
68.8

## Sheet: data_S6B Fig
	Limiting dilution
	Counter	Dose	tested	response
P2 HSA+ CMs	1	100	6	6
	2	20	6	3
	3	4	6	0
P4 HSA+ CMs	1	250	12	12
	2	75	12	11
	3	25	12	4
P2 Cav3+ CMs	1	100	20	0
	2	25	20	0
	3	5	20	0
P4 Cav3+ CMs	1	100	20	0
	2	25	20	0
	3	5	20	0
